# Supplementary material for: Supplementation with compound polysaccharides contributes to the development and metabolic activity of young rat intestinal microbiota
Source: Royal Society of Chemistry journal article supplement (doi:10.1039/c8fo02565g), 2019-01-01
Supplement: c8fo02565g1.pdf [file c8fo02565g1.pdf]

**Figure S1**  $^1\text{H-NMR}$ -based metabonomic analysis of urine and stool samples from Control and CPL, CPM groups. PCA scores of  $^1\text{H-NMR}$  profiles of urine samples (A) and fecea samples (B) in CPL group. PCA scores of  $^1\text{H-NMR}$  profiles of urine samples (C) and feces samples (D) in CPM group.

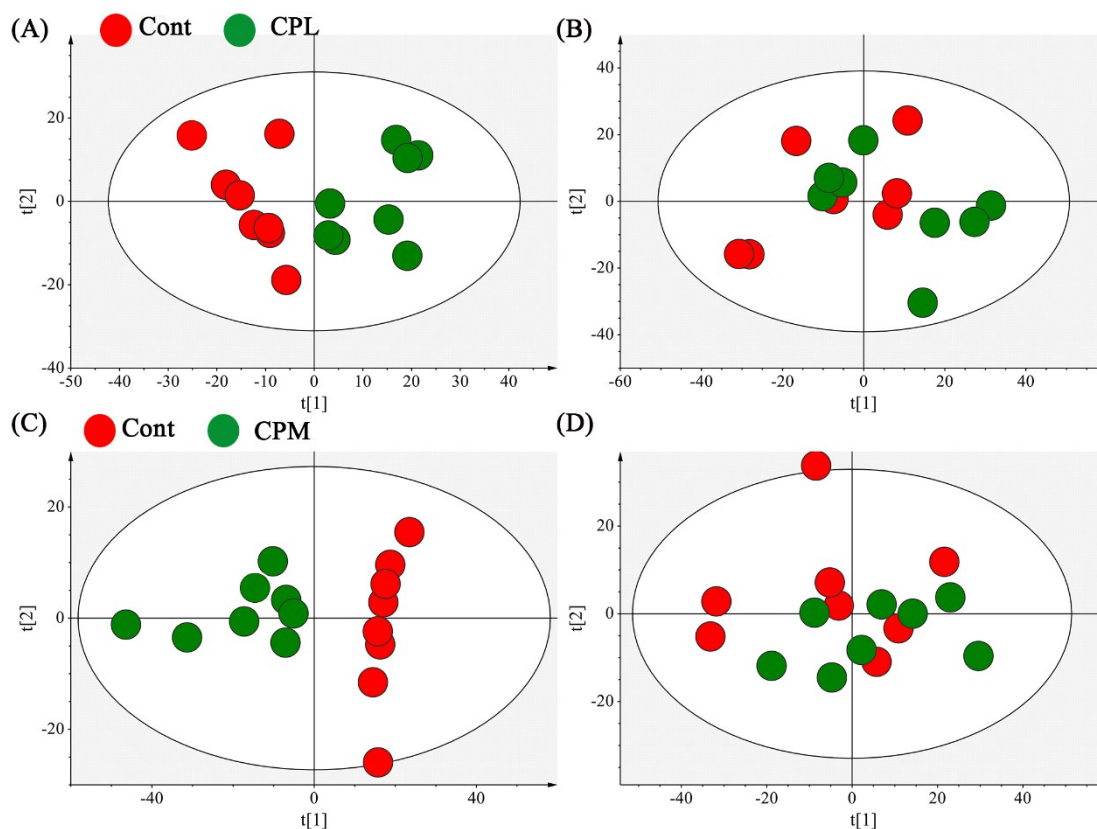

**Figure S2** Partial least square discriminant analysis and validation of biological metabolites in urine and in feces. Partial least square discriminant analysis (PLS-DA) plots of biological metabolites in urine (A) and in feces (B). Validation of biological metabolites in urine (A) and in Feces (B).

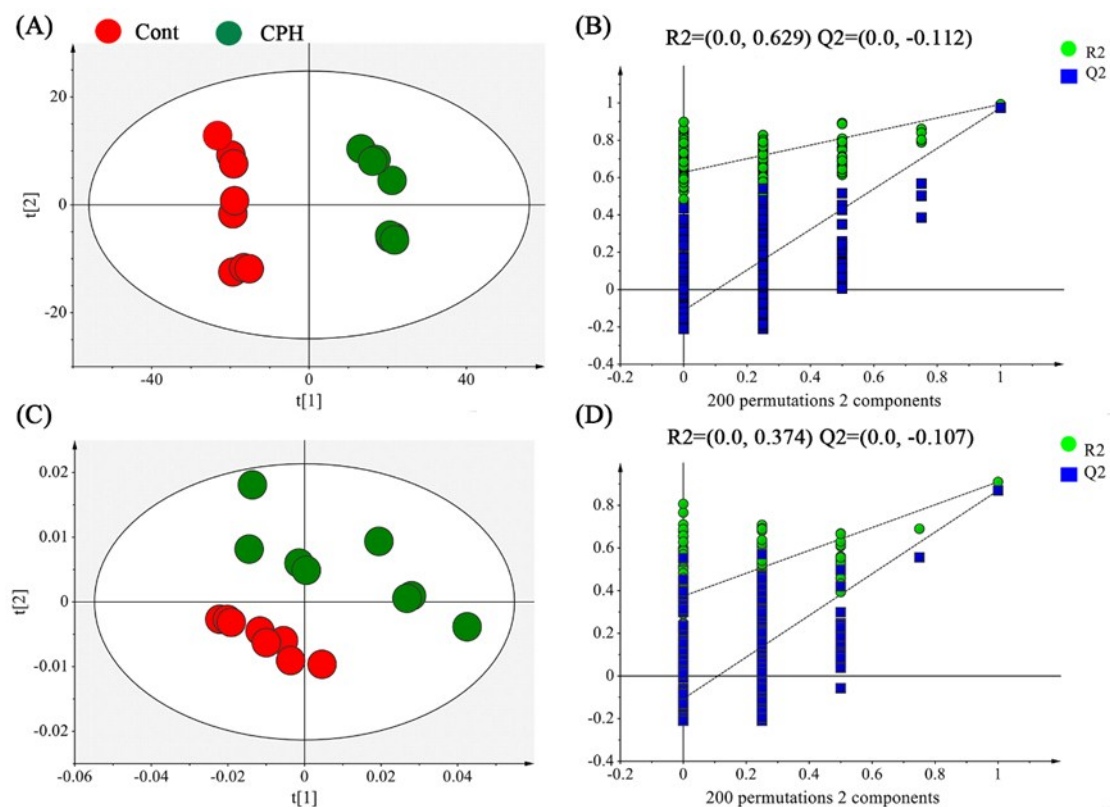

**Figure S3** Rarefaction curves based on (A) Observed\_species, (B) Chao1, (C) PD\_whole\_tree, (D) Shannon and (E) Simpson.

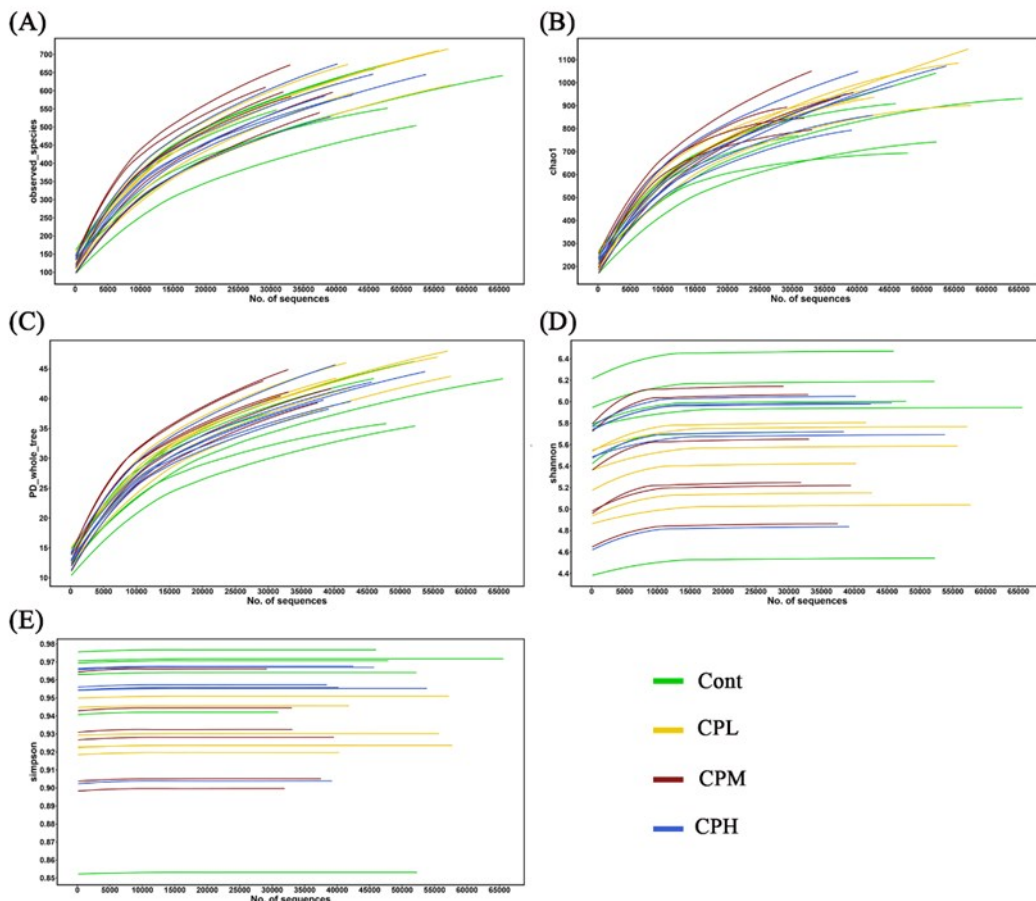

**Figure S4** LEfSe was used to identify the most differentially abundant taxa in the control, CPL and CPM samples at 14 days. (A) 11 taxa meeting a significant LDA threshold value of 2 are shown in the Control and CPL groups. (B) 40 taxa meeting a significant LDA threshold value of 2 are shown in the Control and CPM groups. (E) 36 taxa meeting a significant LDA threshold value of 2 are shown in the Control and CPH groups.

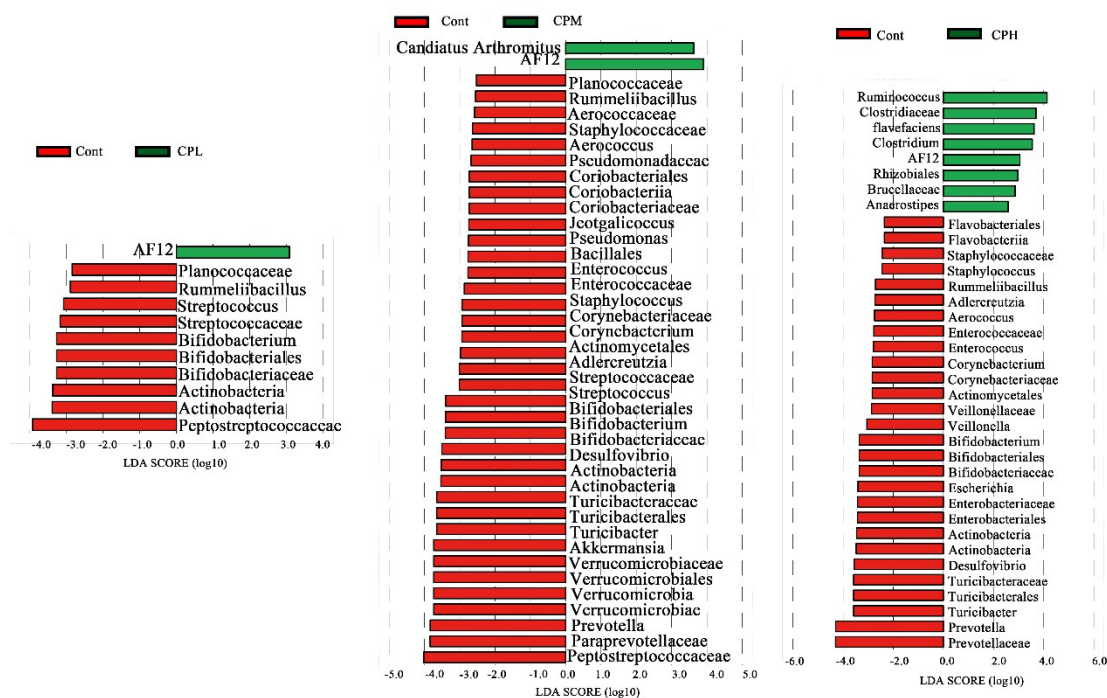

Figure S5 Changes in relative abundance of identified phyla determining the diversity of Control and CPH.

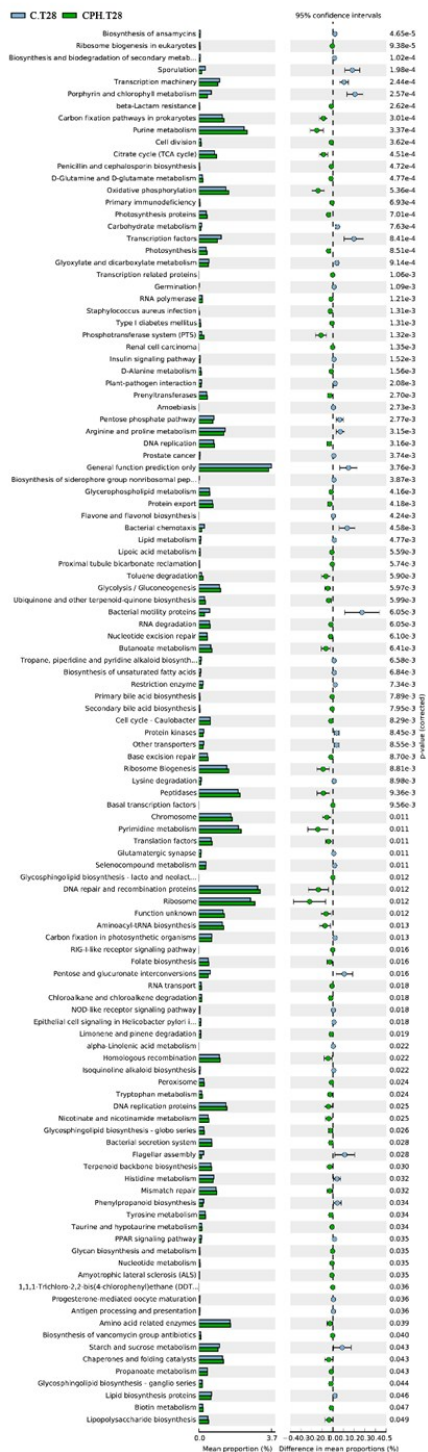

**Supplementary table 1. Effect of compound polysaccharides on the body weight of young rats.**

| Time<br>(week) | Body weight (g) |             |             |             | P value        |                |                |
|----------------|-----------------|-------------|-------------|-------------|----------------|----------------|----------------|
|                | Cont            | CPL         | CPM         | CPH         | Cont vs<br>CPL | Cont vs<br>CPM | Cont<br>vs CPH |
| 0              | 61.7±4.80       | 56.7±7.28   | 64.1±12.30  | 64.3±10.22  | 0.14           | 0.59           | 0.49           |
| 1              | 86.9±5.72       | 84.6±8.61   | 93.0±16.54  | 93.5±9.98   | 0.73           | 0.31           | 0.10           |
| 2              | 123.1±9.29      | 121.1±11.53 | 132.4±22.70 | 129.1±12.18 | 0.96           | 0.26           | 0.25           |
| 3              | 163.4±11.92     | 161.3±11.03 | 174.7±24.52 | 168.8±13.75 | 0.97           | 0.23           | 0.39           |
| 4              | 205.2±17.10     | 205.7±11.78 | 218.0±30.27 | 212.2±13.91 | 0.69           | 0.28           | 0.35           |

**Supplementary table 2. Effect of compound polysaccharides on the digestive tube/body weight.**

|      | The digestive<br>tube/body weight | P value     |             |             |
|------|-----------------------------------|-------------|-------------|-------------|
|      |                                   | Cont vs CPL | Cont vs CPM | Cont vs CPH |
| Cont | 4.91±0.32                         |             |             |             |
| CPL  | 4.45±0.49                         | 0.17        |             |             |
| CPM  | 5.20±0.57                         |             | 0.41        |             |
| CPH  | 5.53±0.65                         |             |             | 0.13        |

**Supplementary table 3. Effect of compound polysaccharides on the duodenum mucosal tissues.**

| Groups                   | Duodenum villus height<br>( $\mu\text{m}$ ) | Duodenum villus height/ crypt depth<br>ratio | Duodenum muscular thickness ( $\mu\text{m}$ ) |
|--------------------------|---------------------------------------------|----------------------------------------------|-----------------------------------------------|
| Cont                     | 444.05±107.02                               | 2.15±0.65                                    | 18.28±2.68                                    |
| CPL                      | 476.74±68.71                                | 2.17±0.90                                    | 14.81±2.90                                    |
| CPM                      | 506.01±53.03                                | 2.74±0.56                                    | 9.85±2.90                                     |
| CPH                      | 573.20±43.50                                | 2.99±0.24                                    | 8.84±3.37                                     |
| P.value<br>(Cont vs CPL) | 0.58                                        | 0.29                                         | 0.085                                         |
| P.value<br>(Cont vs CPM) | 0.27                                        | 0.16                                         | 0.0014                                        |
| P.value<br>(Cont vs CPH) | 0.036                                       | 0.02                                         | 0.0022                                        |

**Supplementary table 4. Effect of compound polysaccharides on the ratio of CD4<sup>+</sup>/CD8<sup>+</sup> lymphocytes cells in spleen tissues.**

| Groups | The ratio of CD4 <sup>+</sup> /CD8 <sup>+</sup> | P.value |
|--------|-------------------------------------------------|---------|
| Cont   | 1.53±0.26                                       |         |
| CPL    | 1.59±0.27                                       | 0.82    |
| CPM    | 1.78±0.15                                       | 0.22    |
| CPH    | 2.17±0.30                                       | 0.045   |

P values were considered statistically significant relative to the Cont group.

**Supplementary table 5. The differences Bacteroidetes-to-Firmicutes ratio among the different four groups.**

| Groups | Relative abundance (%) |            | Bacteroidetes-to-Firmicutes ratio |
|--------|------------------------|------------|-----------------------------------|
|        | Bacteroidetes          | Firmicutes |                                   |
| Cont   | 70.39±4.71             | 24.95±4.63 | 2.82                              |
| CPL    | 62.33±11.64            | 28.90±9.59 | 2.15                              |
| CPM    | 60.69±9.49             | 31.43±9.11 | 1.93                              |
| CPH    | 66.96±6.37             | 23.61±6.99 | 2.84                              |
