# Supplementary material for: Supplementation with compound polysaccharides contributes to the development and metabolic activity of young rat intestinal microbiota
Source: Royal Society of Chemistry journal article supplement (doi:10.1039/c8fo02565g), 2019-01-01
Supplement: c8fo02565g2.xlsx [file c8fo02565g2.xlsx]

## Sheet: Supplementary Table 6
Supplementary table 4. Corresponding correlation coefficients (|r| ≥ 0.7) between significant metabolites in the urine samples and gut microbiota.
	2-Hydroxybutyrate	Isovalerylglycine	Ketoleucine	Isopropanol	3-Hydroxyisovalerate	Citrulline	Ornithine	Proline	Glutamate	p-cresol	p-Cresol glucuronide	p-cresol sulfate	Methylamine	Methylguanidine	creatinine	Choline	Glycogen	Tartrate	p-Hydroxybenzoate	Alanine	N-Acetylglycine	Glutamine	Creatine	Mannitol	Phenylacetylglycine	Indole-3-acetate	Glycolate	Fumarate	τ-Methylhistidine	Phenylalanine	Phosphorylcholine
Bifidobacteriaceae										-0.776
Bifidobacterium										-0.776
pseudolongum										-0.776
Coriobacteriaceae										-0.742									-0.73									0.752
Adlercreutzia							-0.737			-0.752									-0.758									0.788
ovatus			0.727														0.75	0.812							-0.725	-0.732	-0.726
Porphyromonadaceae																0.748
Parabacteroides																0.748
distasonis			0.734								0.741		0.755														-0.731			0.761	-0.705
Rikenellaceae	0.917		0.807		0.889		0.71	0.815	0.736	0.75	0.834		0.728	0.864	-0.705	0.884				-0.759	-0.829	0.736	-0.705	-0.838	-0.852	-0.82	-0.811		-0.843	0.789	-0.809
S24-7	-0.756		-0.782	-0.739				-0.711	-0.781							-0.758	-0.742	-0.781			0.765	-0.781		0.742	0.791	0.797	0.78		0.769	-0.735	0.734
Staphylococcaceae		-0.737	-0.756			-0.703			-0.753	-0.825	-0.761	-0.739	-0.712	-0.719							0.748	-0.753		0.799	0.707	0.73	0.776		0.731	-0.749	0.757
Jeotgalicoccus										-0.836
psychrophilus										-0.836
Aerococcaceae		-0.746	-0.787					-0.754		-0.799	-0.81	-0.781	-0.71	-0.773		-0.732	-0.714	-0.707			0.774	-0.808		0.805	0.769	0.789	0.801		0.781	-0.78	0.748
Lactobacillaceae	-0.741		-0.748		-0.724		-0.719		-0.765	-0.877	-0.744	-0.788	-0.702	-0.804		-0.701			-0.791	0.831	0.751	-0.765		0.785	0.714	0.72	0.743	0.785	0.741
Lactobacillus	-0.741		-0.748		-0.724		-0.719		-0.766	-0.875	-0.744	-0.788	-0.702	-0.804		-0.702			-0.791	0.832	0.751	-0.766		0.785	0.715	0.721	0.743	0.786	0.742
Veillonellaceae																									0.711	0.719	0.702			-0.711
Veillonella																									0.711	0.719	0.702			-0.711
dispar																									0.711	0.719	0.702			-0.711
Erysipelotrichaceae										-0.772
Allobaculum										-0.799
Alcaligenaceae										-0.705
Alcaligenes							-0.759			-0.826
faecalis							-0.759			-0.826
Oligella										-0.754
Sutterella										-0.7
Aeromonadaceae										-0.742
Escherichia									0.774													0.774
coli									0.774													0.774

## Sheet: Supplementary Tble 7
Supplementary table 7. Corresponding correlation coefficients (|r| ≥ 0.7) between significant metabolites in the stool samples and gut microbiota.
	Valerate	Valine	Propionate	Lactate	Alanine	Acetate	Proline	Butyrate	Pyruvate	Asparagine	Phenylalanine	Histidine	Taurine	Methanol	Glycine
Bifidobacteriaceae								0.756
Bifidobacterium								0.756
pseudolongum								0.756
Coriobacteriaceae								0.7
Porphyromonadaceae				0.764					0.867
Parabacteroides				0.764					0.867
distasonis											0.762				0.801
Rikenellaceae				0.735					0.763					-0.828
S24-7														0.732
Staphylococcaceae								0.7
Jeotgalicoccus	0.716							0.756
psychrophilus	0.716							0.756
Enterococcaceae									0.751
Enterococcus									0.751
Lactobacillaceae								0.723	-0.721
Lactobacillus								0.72	-0.721
Veillonellaceae														0.725
Veillonella														0.725
dispar														0.725
Erysipelotrichaceae	0.815		0.737					0.836
Allobaculum	0.841		0.729					0.875
Alcaligenaceae	0.904	-0.729	0.891	-0.739	-0.711	0.781	-0.72	0.859		-0.785	-0.73	-0.769
Alcaligenes	0.738							0.784
faecalis	0.738							0.784
Oligella	0.717							0.77
Sutterella	0.901	-0.731	0.889	-0.738	-0.71	0.782	-0.717	0.855		-0.784	-0.73	-0.767
Aeromonadaceae	0.709							0.764
Escherichia				0.708					0.759				0.761
coli				0.708					0.759				0.761
